# Supplementary material
Source: MDPI journal article supplement (https://www.mdpi.com/2227-9040/11/6/330)
Supplement: s1 [file s1]

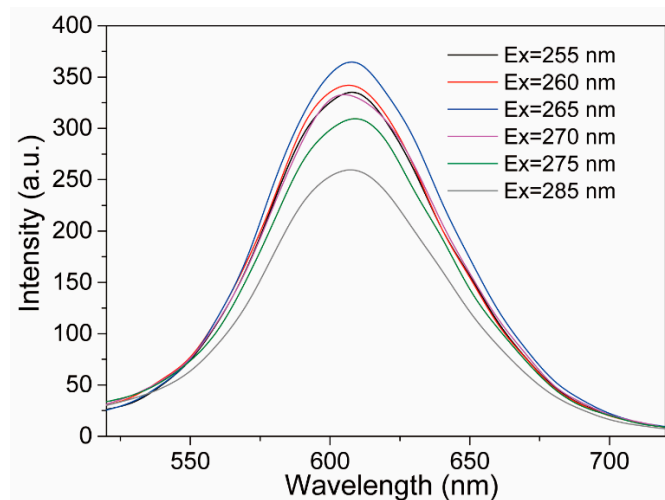

**Figure S1.** Fluorescence emission spectra of MUA-AuNCs at different excitation wavelengths.

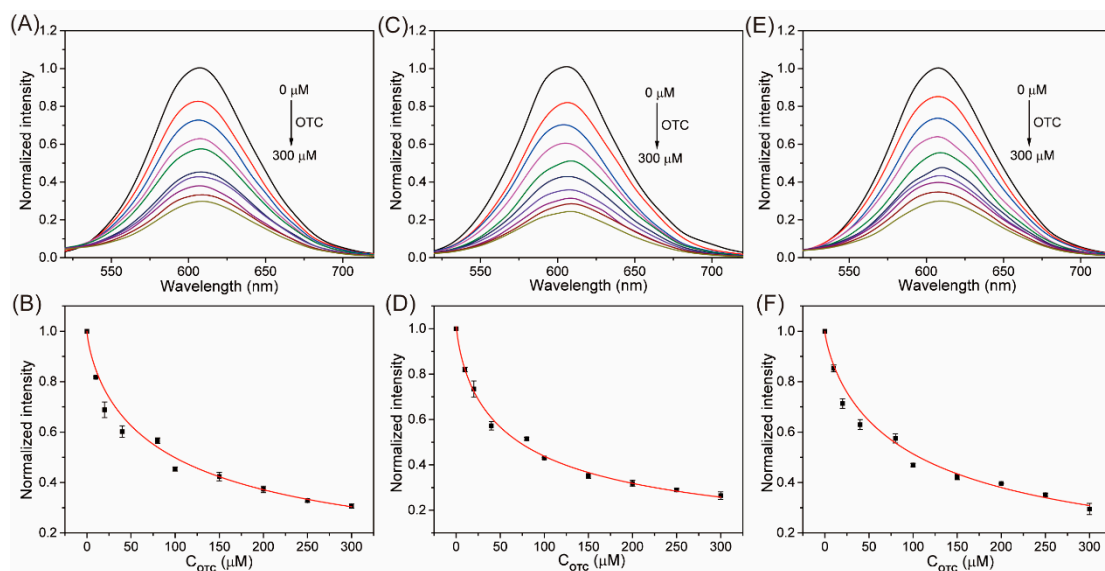

**Figure S2.** The fluorescence spectra of (A) MUA-AuNCs-Gd<sup>3+</sup>, (C) MUA-AuNCs-Ce<sup>3+</sup> and (E) MUA-AuNCs-Tm<sup>3+</sup> towards OTC (0-300  $\mu$ M). The changes of the normalized fluorescence intensity of (B) MUA-AuNCs-Gd<sup>3+</sup>, (D) MUA-AuNCs-Ce<sup>3+</sup> and (F) MUA-AuNCs-Tm<sup>3+</sup> at 610 nm with the concentration of OTC ( $\lambda_{ex}$  = 265 nm).

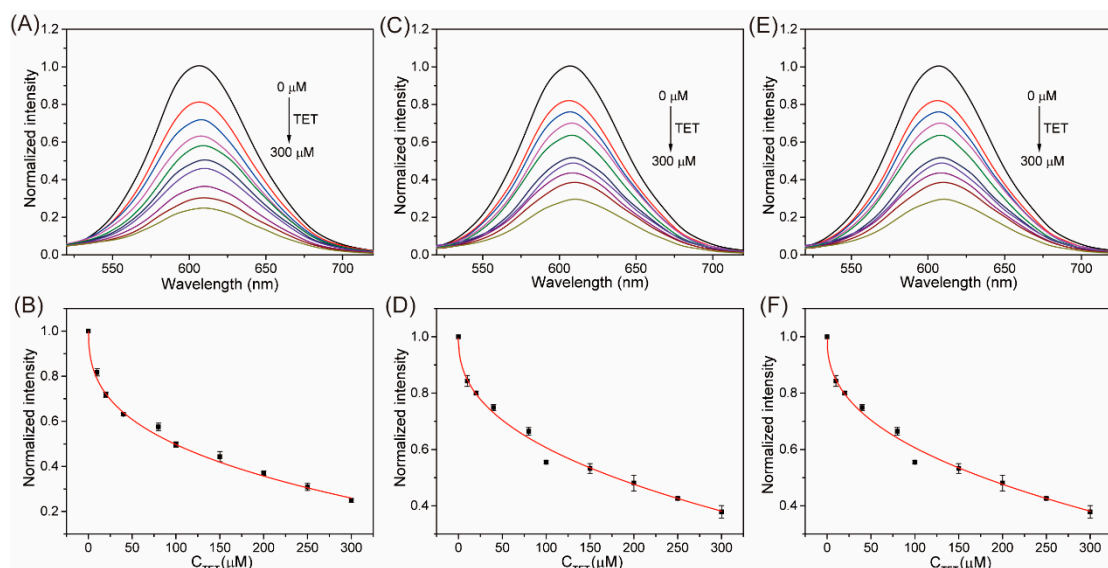

**Figure S3.** The fluorescence spectra of (A) MUA-AuNCs-Gd<sup>3+</sup>, (C) MUA-AuNCs-Ce<sup>3+</sup> and (E) MUA-AuNCs-Tm<sup>3+</sup> towards TET (0-300  $\mu$ M). The changes of the normalized fluorescence intensity of (B) MUA-AuNCs-Gd<sup>3+</sup>, (D) MUA-AuNCs-Ce<sup>3+</sup> and (F) MUA-AuNCs-Tm<sup>3+</sup> at 610 nm with the concentration of TET ( $\lambda_{\text{ex}} = 265$  nm).

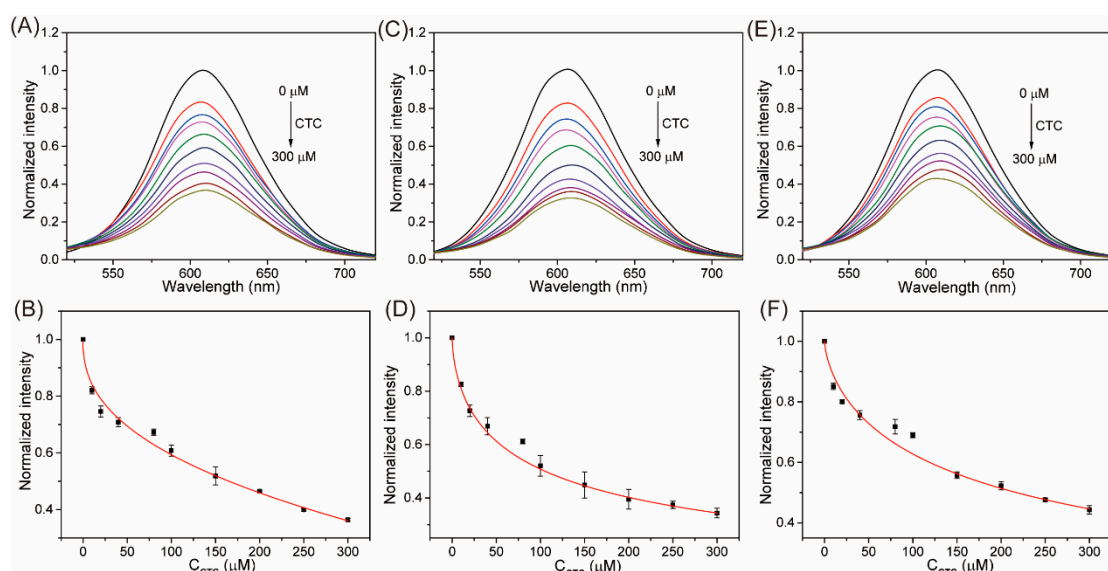

**Figure S4.** The fluorescence spectra of (A) MUA-AuNCs-Gd<sup>3+</sup>, (C) MUA-AuNCs-Ce<sup>3+</sup> and (E) MUA-AuNCs-Tm<sup>3+</sup> towards CTC (0-300  $\mu$ M). The changes of the normalized fluorescence intensity of (B) MUA-AuNCs-Gd<sup>3+</sup>, (D) MUA-AuNCs-Ce<sup>3+</sup> and (F) MUA-AuNCs-Tm<sup>3+</sup> at 610 nm with the concentration of CTC ( $\lambda_{\text{ex}} = 265$  nm).

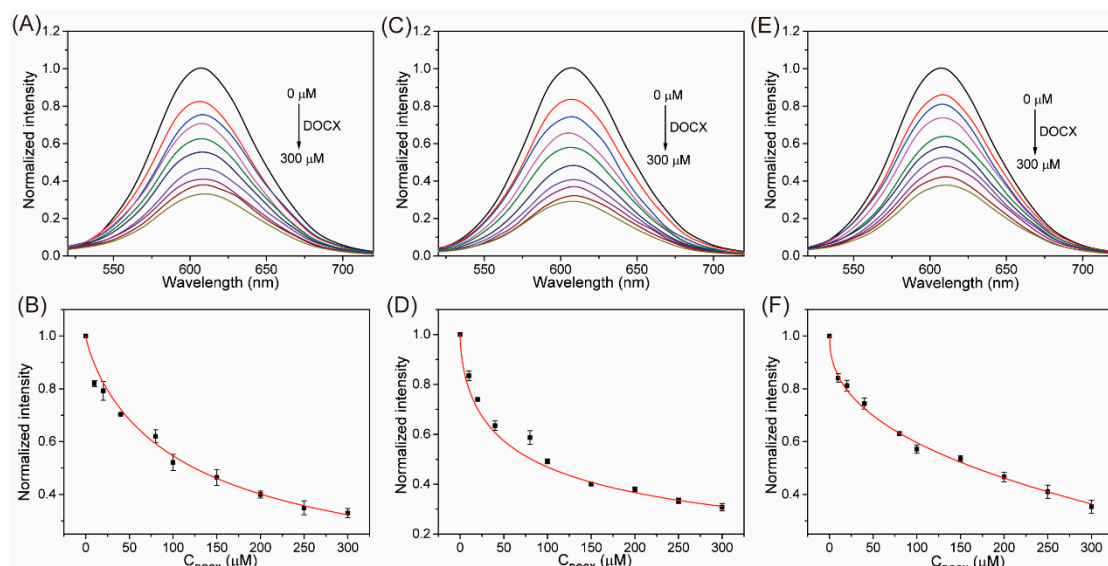

**Figure S5.** The fluorescence spectra of (A) MUA-AuNCs-Gd<sup>3+</sup>, (C) MUA-AuNCs-Ce<sup>3+</sup> and (E) MUA-AuNCs-Tm<sup>3+</sup> towards DOCX (0-300  $\mu$ M). The changes of the normalized fluorescence intensity of (B) MUA-AuNCs-Gd<sup>3+</sup>, (D) MUA-AuNCs-Ce<sup>3+</sup> and (F) MUA-AuNCs-Tm<sup>3+</sup> at 610 nm with the concentration of DOCX ( $\lambda_{\text{ex}} = 265$  nm).

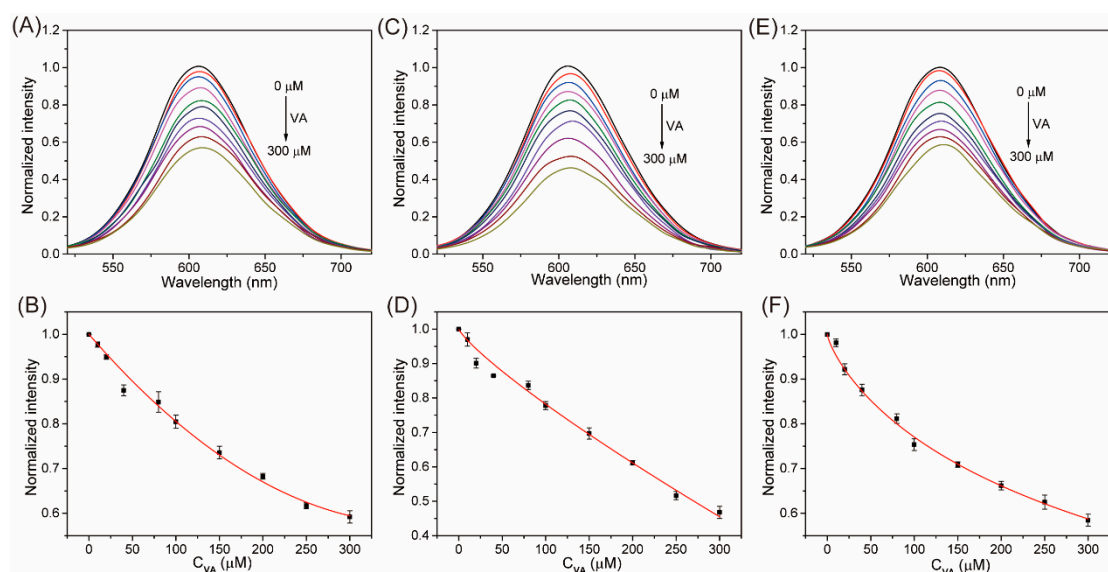

**Figure S6.** The fluorescence spectra of (A) MUA-AuNCs-Gd<sup>3+</sup>, (C) MUA-AuNCs-Ce<sup>3+</sup> and (E) MUA-AuNCs-Tm<sup>3+</sup> towards VA (0-300  $\mu$ M). The changes of the normalized fluorescence intensity of (B) MUA-AuNCs-Gd<sup>3+</sup>, (D) MUA-AuNCs-Ce<sup>3+</sup> and (F) MUA-AuNCs-Tm<sup>3+</sup> at 610 nm with the concentration of VA ( $\lambda_{\text{ex}} = 265$  nm).

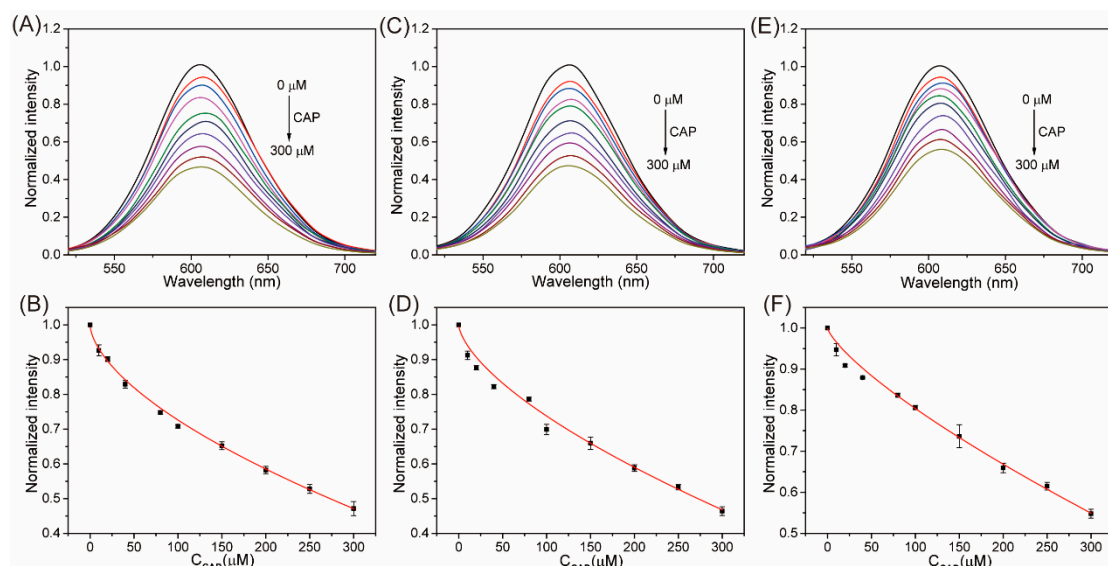

**Figure S7.** The fluorescence spectra of (A) MUA-AuNCs-Gd<sup>3+</sup>, (C) MUA-AuNCs-Ce<sup>3+</sup> and (E) MUA-AuNCs-Tm<sup>3+</sup> towards CAP (0-300 μM). The changes of the normalized fluorescence intensity of (B) MUA-AuNCs-Gd<sup>3+</sup>, (D) MUA-AuNCs-Ce<sup>3+</sup> and (F) MUA-AuNCs-Tm<sup>3+</sup> at 610 nm with the concentration of CAP ( $\lambda_{\text{ex}} = 265 \text{ nm}$ ).

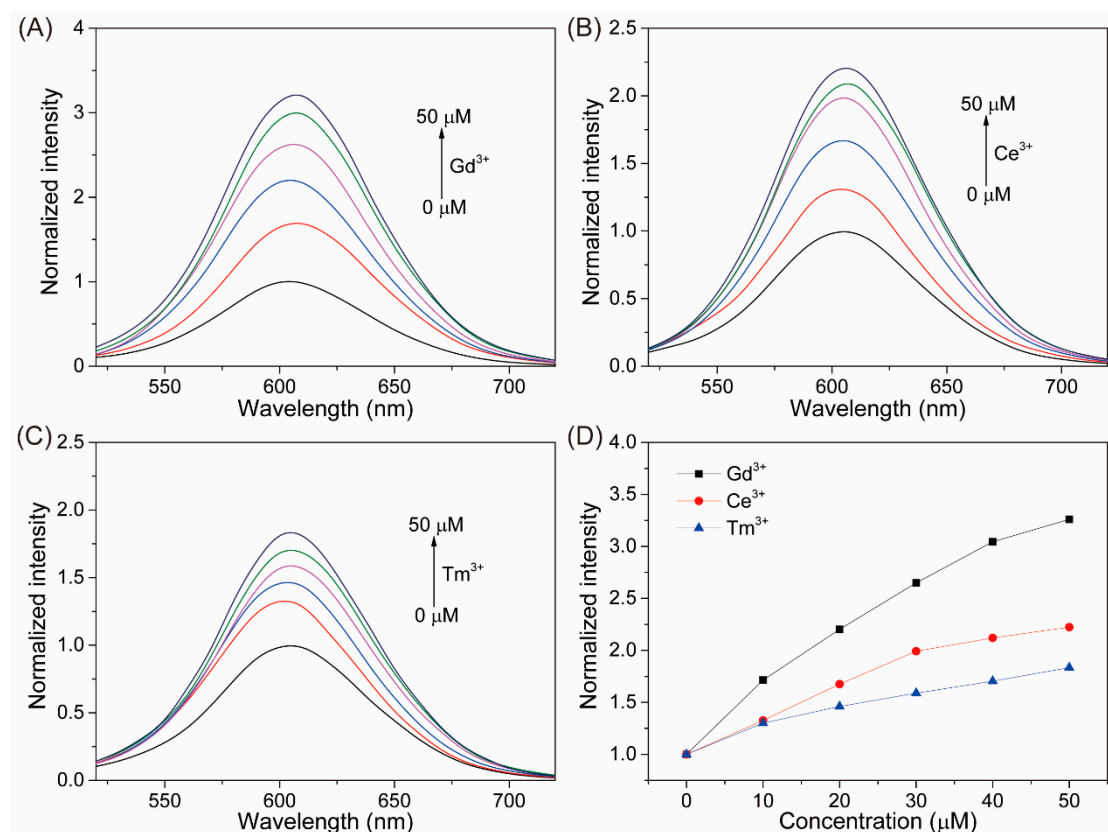

**Figure S8.** The effect of the concentration of the different rare earth ions on the fluorescence intensity of MUA-AuNCs. Fluorescence emission spectra of MUA-AuNCs after the addition of (A) Gd<sup>3+</sup>, (B) Ce<sup>3+</sup> and (C) Tm<sup>3+</sup> (0-50 μM) in the pure aqueous solution (pH = 7.2). (D) The effect of the rare earth ions (0-50 μM) on the fluorescence intensity of MUA-AuNCs at 610 nm. ( $\lambda_{\text{ex}} = 265 \text{ nm}$ ).

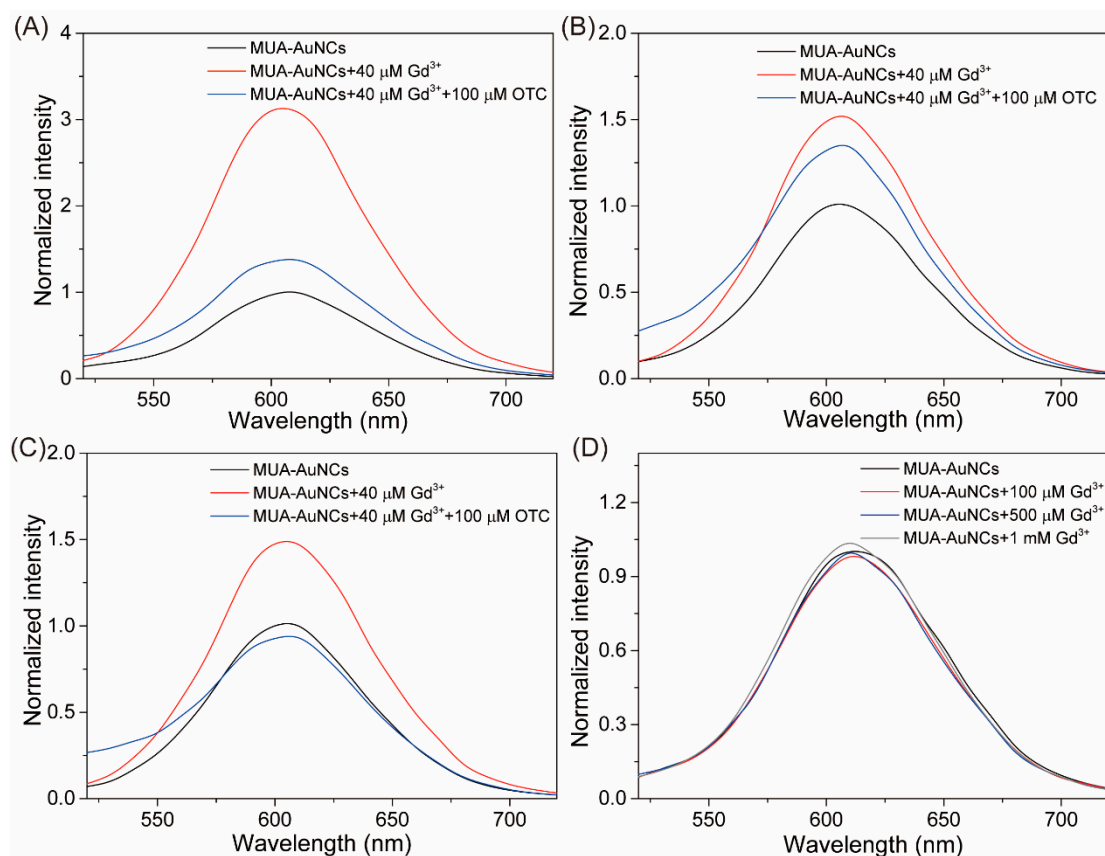

**Figure S9.** Fluorescence emission spectra of MUA-AuNCs-Gd<sup>3+</sup> in different solutions in response to OTC. (A) Pure aqueous solution (pH = 7.2), (B) Tris-HCl solution (pH = 7.4), (C) HEPES buffer solution (pH = 7.4) and (D) PBS (pH = 7.4).

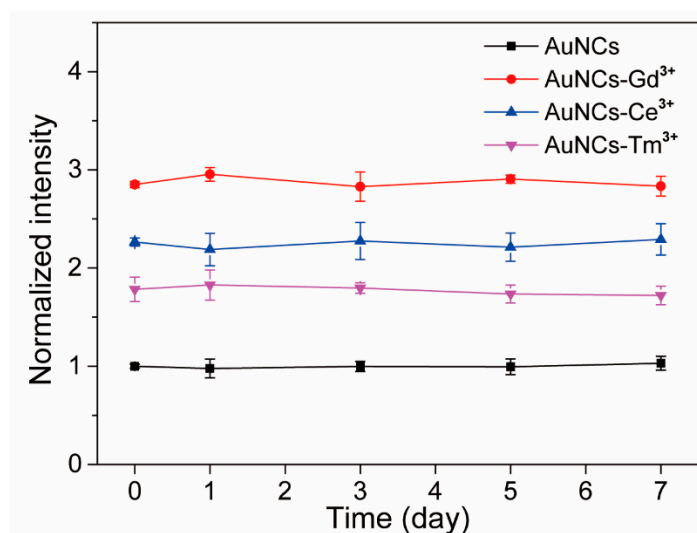

**Figure S10.** Fluorescence stability of MUA-AuNCs and different MUA-AuNCs-Re<sup>3+</sup> within one week.

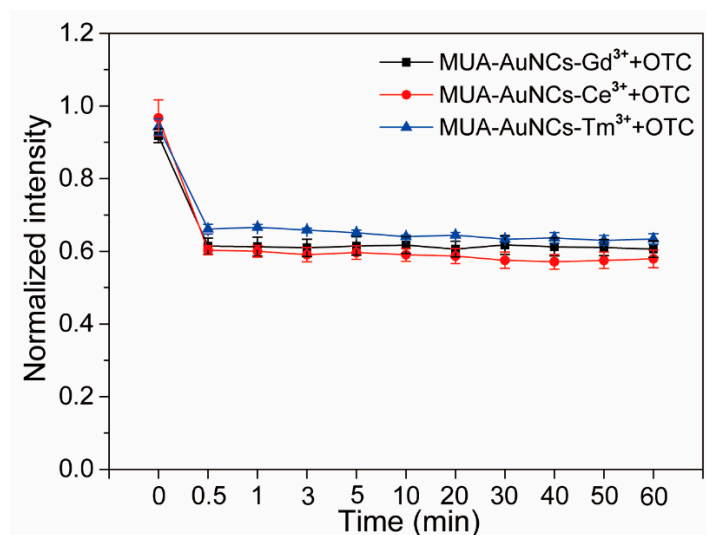

**Figure S11.** The effect of the response time with OTC on the fluorescence intensity of the MUA-AuNCs-Re<sup>3+</sup> sensor array within 1 h (based on the normalized fluorescence intensity at 610 nm).

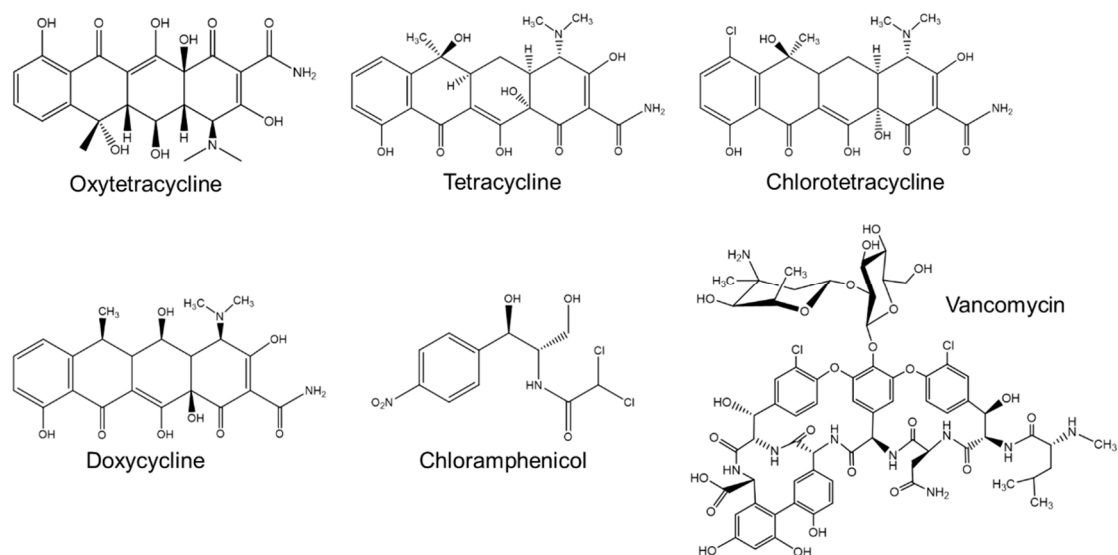

**Figure S12.** Chemical formulae of different antibiotics.

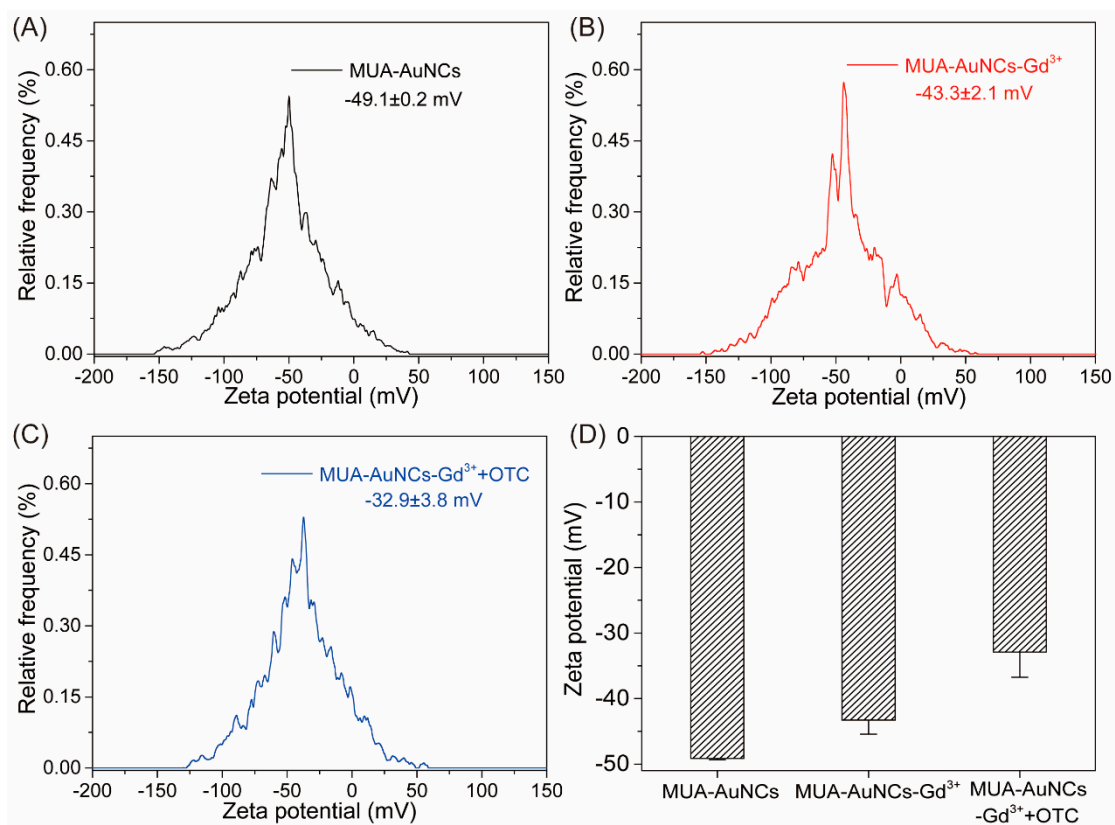

**Figure S13.** Zeta potential maps of (A) MUA-AuNCs, (B) MUA-AuNCs-Gd<sup>3+</sup> and (C) MUA-AuNCs-Gd<sup>3+</sup>+OTC. (D) Zeta potential of MUA-AuNCs after mixed with Gd<sup>3+</sup> and OTC.

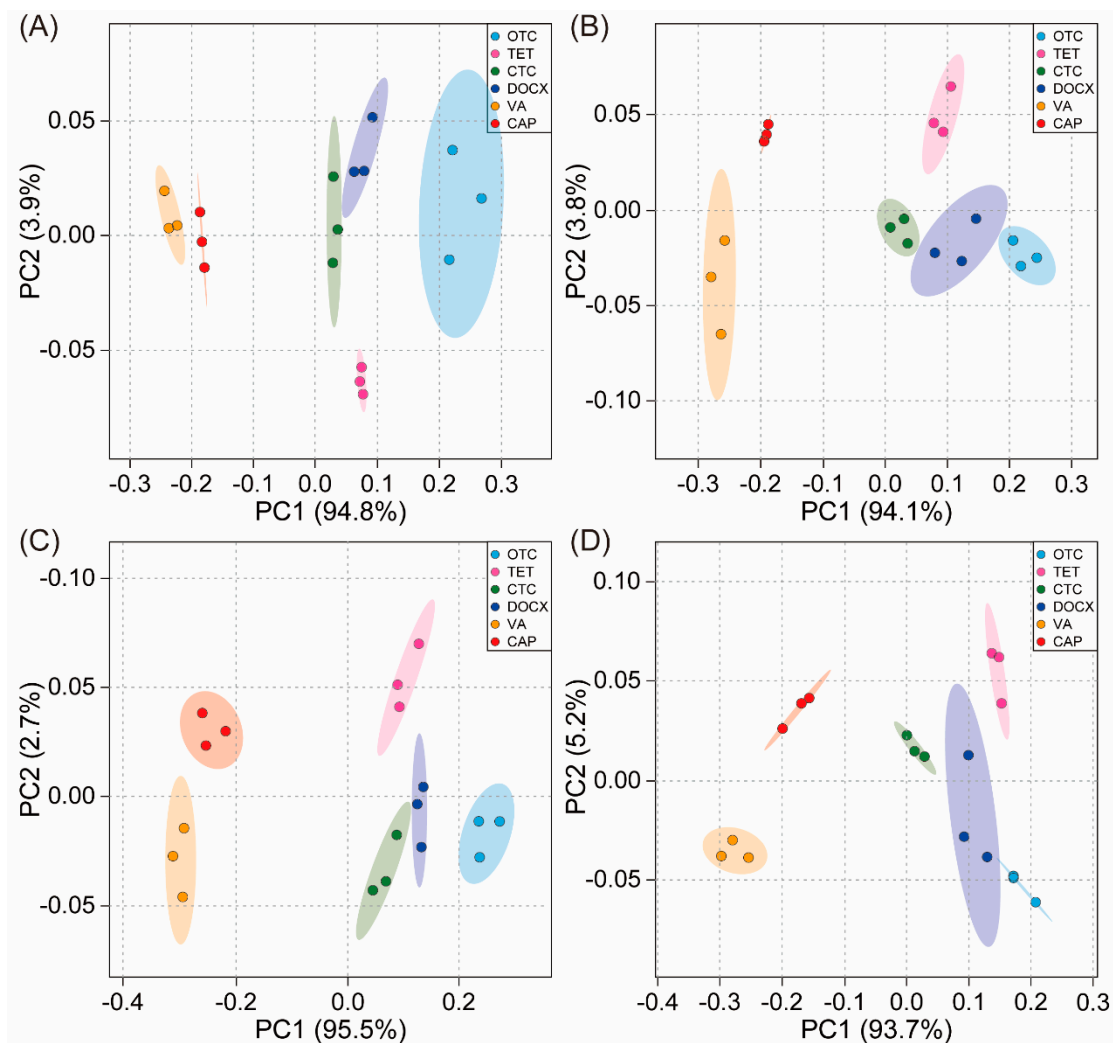

**Figure S14.** 2D PCA plots for the distinguish of the multiple antibiotics at different concentrations (A) 40  $\mu\text{M}$ , (B) 80  $\mu\text{M}$ , (C) 150  $\mu\text{M}$ , and (D) 300  $\mu\text{M}$ . The ellipses in the figure are plotted with 95% confidence intervals.

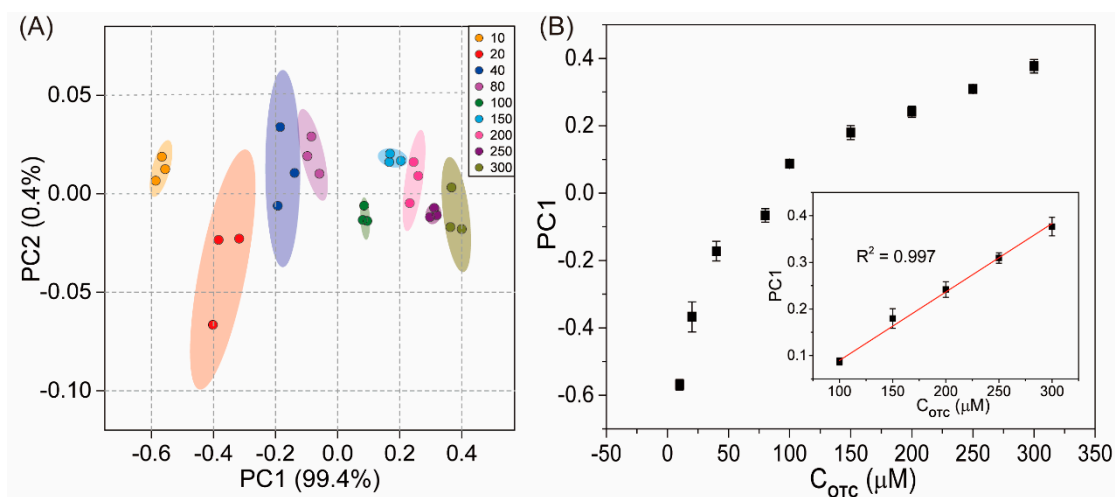

**Figure S15.** (A) 2D PCA plot of the MUA-AuNCs-Re<sup>3+</sup> sensor array towards different concentrations of OTC (10-300  $\mu\text{M}$ ) (ellipses are drawn with 95% confidence). (B) PC1 of the sensor array plotted versus different concentrations of OTC. Inset: the linear relationship in the concentration of OTC from 100 to 300  $\mu\text{M}$  ( $n = 3$ ).



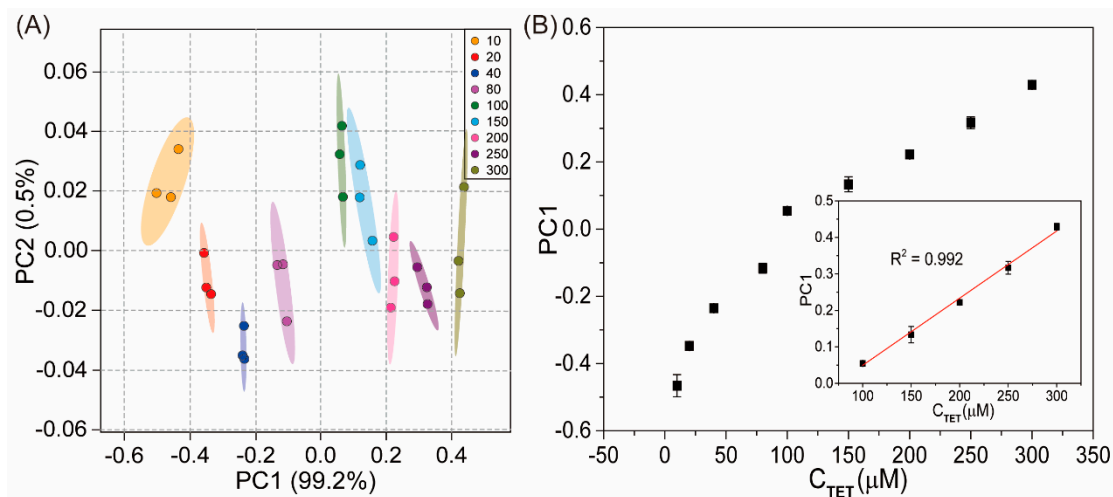

**Figure S16.** (A) 2D PCA plot of the MUA-AuNCs-Re<sup>3+</sup> sensor array towards different concentrations of TET (10-300  $\mu$ M) (ellipses are drawn with 95% confidence). (B) PC1 of the sensor array plotted versus different concentrations of TET. Inset: the linear relationship in the concentration of TET from 100 to 300  $\mu$ M ( $n = 3$ ).

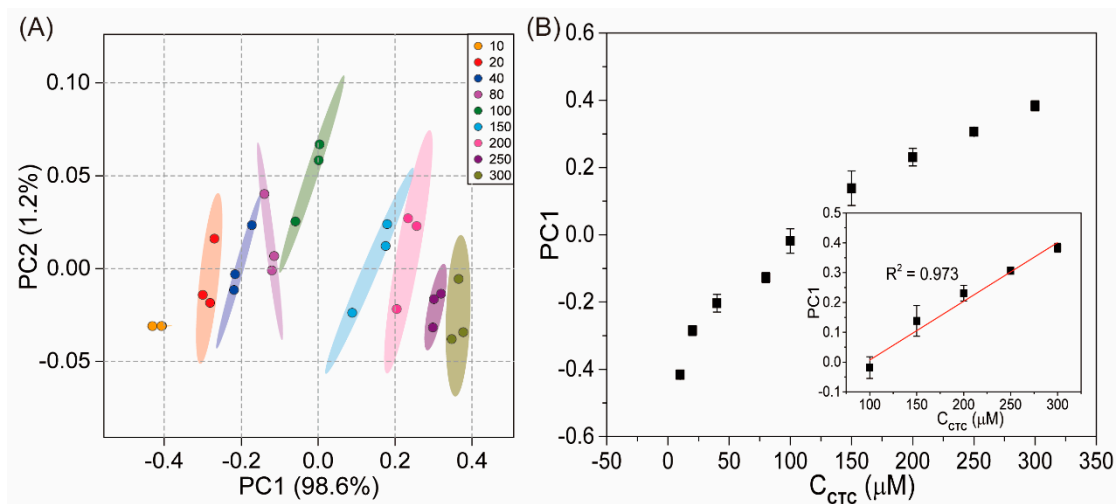

**Figure S17.** (A) 2D PCA plot of the MUA-AuNCs-Re<sup>3+</sup> sensor array towards different concentrations of CTC (10-300  $\mu$ M) (ellipses are drawn with 95% confidence). (B) PC1 of the sensor array plotted versus different concentrations of CTC. Inset: the linear relationship in the concentration of CTC from 100 to 300  $\mu$ M ( $n = 3$ ).

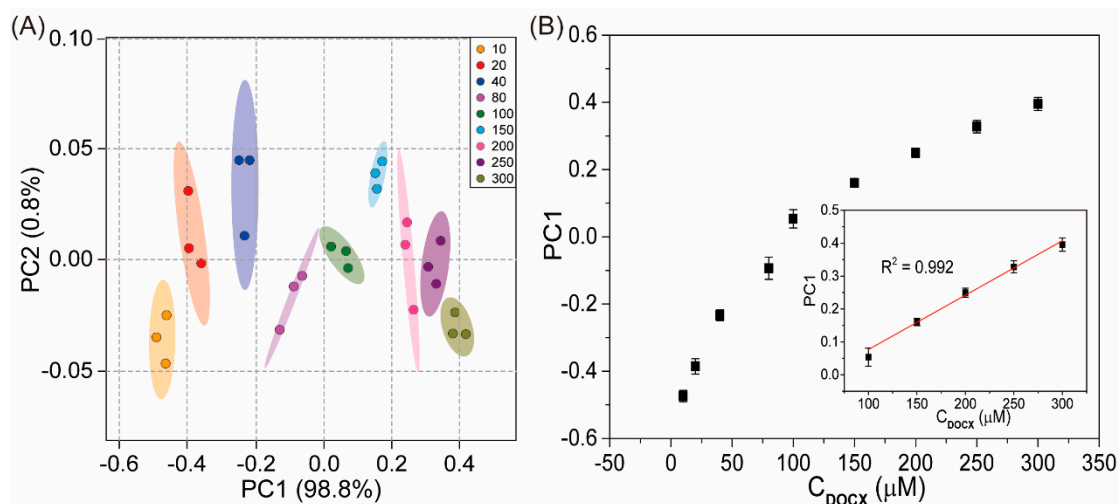

**Figure S18.** (A) 2D PCA plot of the MUA-AuNCs-Re<sup>3+</sup> sensor array towards different concentrations of DOCX (10-300  $\mu$ M) (ellipses are drawn with 95% confidence). (B) PC1 of the sensor array plotted versus different concentrations of DOCX. Inset: the linear relationship in the concentration of DOCX from 100 to 300  $\mu$ M ( $n = 3$ ).

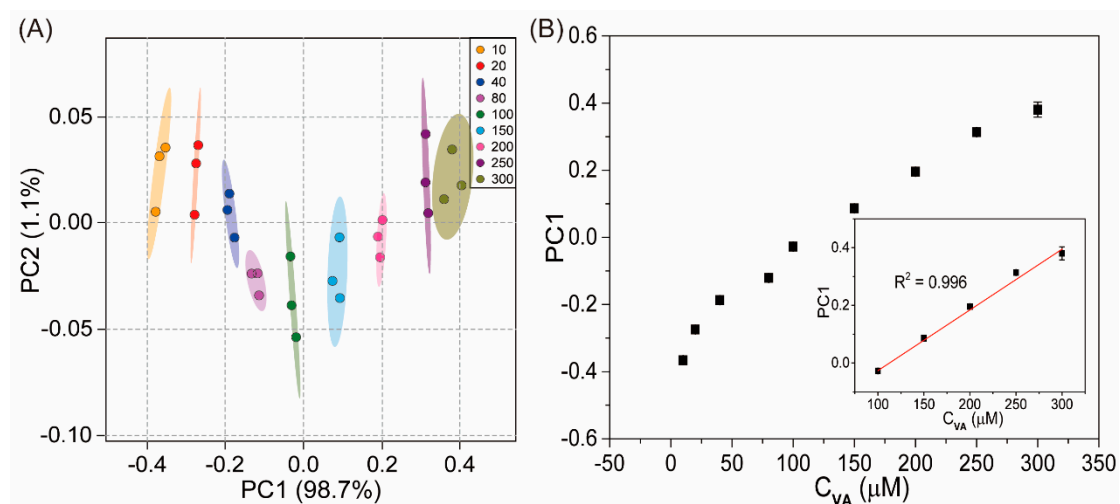

**Figure S19.** (A) 2D PCA plot of the MUA-AuNCs-Re<sup>3+</sup> sensor array towards different concentrations of VA (10-300  $\mu$ M) (ellipses are drawn with 95% confidence). (B) PC1 of the sensor array plotted versus different concentrations of VA. Inset: the linear relationship in the concentration of VA from 100 to 300  $\mu$ M ( $n = 3$ ).

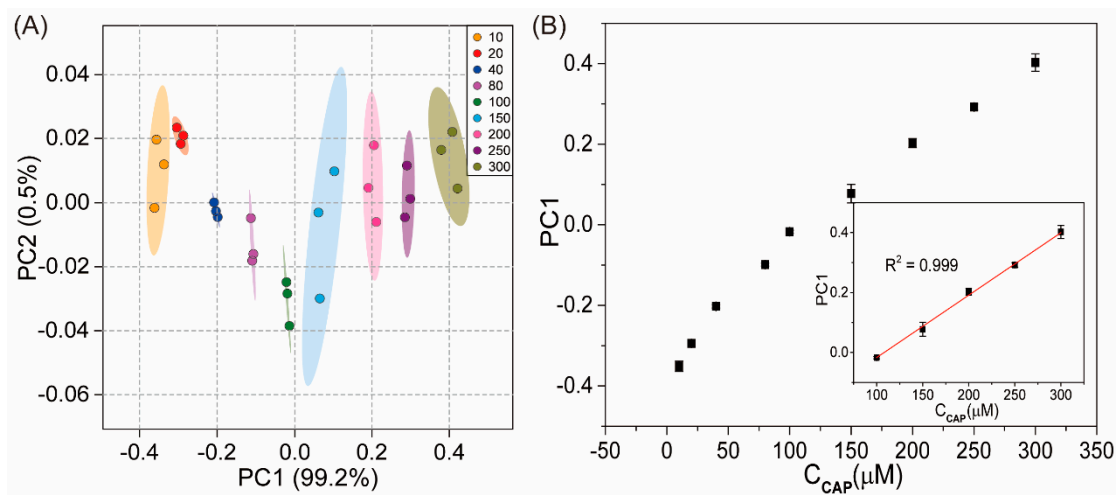

**Figure S20.** (A) 2D PCA plot of the MUA-AuNCs-Re<sup>3+</sup> sensor array towards different concentrations of CAP (10-300  $\mu$ M) (ellipses are drawn with 95% confidence). (B) PC1 of the sensor array plotted versus different concentrations of CAP. Inset: the linear relationship in the concentration of CAP from 100 to 300  $\mu$ M ( $n = 3$ ).
